# Supplementary material
Source: PubMed Central journal article supplement (PMC5439454)
Supplement: Supp_Figure1.pdf [file Supp_Figure1.pdf]

## Supplementary Data

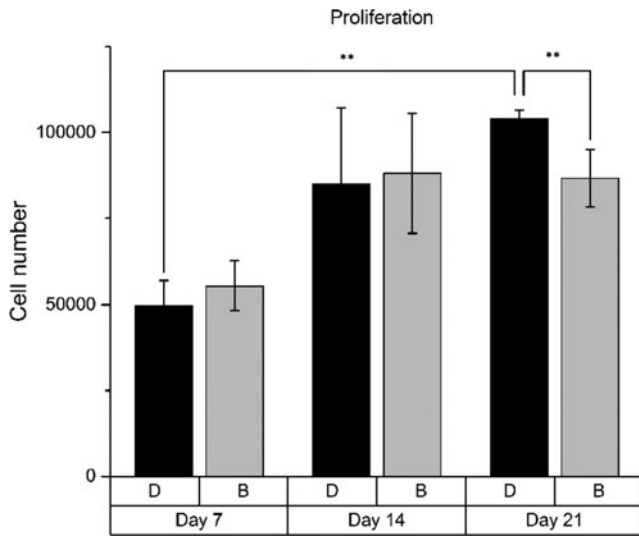

**SUPPLEMENTARY FIG. S1.** Cell proliferation over 21 days of differentiation. Bars represent mean  $\pm$  standard deviation ( $n=3$ ); D, dexamethasone group; B, BMP-2 group; \* $P < 0.05$ ; \*\* $P < 0.01$ ; \*\*\* $P < 0.001$ .
