# Supplementary material
Source: PubMed Central journal article supplement (PMC5439454)
Supplement: Supp_Table1.pdf [file Supp_Table1.pdf]

SUPPLEMENTARY TABLE S1. SIGNIFICANT METABOLITE CHANGES AT DAY 7 OF OSTEOGENESIS COMPARED WITH UNDIFFERENTIATED MESENCHYMAL STEM CELLS

| <i>Group</i> | <i>Metabolite name</i> | <i>Fold change</i> |
|--------------|------------------------|--------------------|
| Dex          | Glycine                | 7.2981105          |
|              | Threonine              | 7.4853806          |
|              | Phenylalanine          | 7.3229423          |
|              | Tyrosine               | 7.1847806          |
|              | Methionine             | 7.0642815          |
|              | Cholesterol            | 2.3525615          |
|              | Isoleucine             | 7.353789           |
|              | Valine                 | 7.2833643          |
|              | Glutamine              | 6.479458           |
|              | Glycerol               | 7.1929746          |
|              | Myoinositol            | 7.7187176          |
| BMP-2        | Isoleucine             | 3.4755905          |
|              | Phenylalanine          | 3.5424957          |
|              | Tyrosine               | 3.4366663          |
|              | Isocitrate             | 0.20523743         |

*Red* and *green* denote significantly increased or decreased metabolites, respectively, as presented in the core metabolic network reconstruction. Fold changes are expressed as unlogged values.

BMP-2, bone morphogenetic protein-2; Dex, dexamethasone.
