# Supplementary material
Source: PubMed Central journal article supplement (PMC5439454)
Supplement: Supp_Table2.pdf [file Supp_Table2.pdf]

SUPPLEMENTARY TABLE S2. SIGNIFICANT METABOLITE  
CHANGES AT DAY 14 OF OSTEOGENESIS COMPARED  
WITH DAY 7 OF IN VITRO OSTEOGENESIS

| <i>Group</i> | <i>Metabolite name</i> | <i>Fold change</i> |
|--------------|------------------------|--------------------|
| Dex          | Myoinositol            | 0.2837367          |
|              | Valine                 | 0.28644475         |
|              | Isoleucine             | 0.29700163         |
|              | Glycerol               | 0.39068994         |
|              | Lactate                | 0.24756186         |
|              | Glycine                | 0.24874723         |
|              | Phenylalanine          | 0.29394376         |
|              | Tyrosine               | 0.38096035         |
|              | b-alanine              | 0.25359312         |
|              | Ornithine              | 0.5429432          |
| Threonine    | 0.3253049              |                    |
| BMP-2        | Tyrosine               | 1.893596           |
|              | Glycose                | 2.6315317          |
|              | Methionine             | 2.6232958          |
|              | Fumarate               | 2.8340786          |
|              | Glycine                | 2.6579466          |
|              | Threonine              | 2.3484247          |
|              | Citrate                | 3.577558           |
|              | Myoinositol            | 2.6136405          |
|              | Glutamate              | 3.0102074          |

*Red* and *green* denote significantly increased or decreased metabolites, respectively, as presented in the core metabolic network reconstruction. Fold changes are expressed as unlogged values.
