# Supplementary material
Source: PubMed Central journal article supplement (PMC5439454)
Supplement: Supp_Table3.pdf [file Supp_Table3.pdf]

SUPPLEMENTARY TABLE S3. SIGNIFICANT METABOLITE CHANGES AT DAY 21 OF OSTEOGENESIS COMPARED WITH DAY 14 OF IN VITRO OSTEOGENESIS

| <i>Group</i> | <i>Metabolite name</i> | <i>Fold change</i> |
|--------------|------------------------|--------------------|
| Dex          | Lysine                 | 4.8260593          |
|              | Fumarate               | 1.3709074          |
|              | Phenylalanine          | 1.0946598          |
|              | Ornithine              | 1.1212214          |
|              | Cholesterol            | 4.2115283          |
|              | Glycerol               | 1.3450942          |
|              | Pyruvate               | 2.7201507          |
|              | Gaba                   | 0.44058445         |
|              | b-alanine              | 0.69571054         |
|              | Glutamine              | 0.65733093         |
|              | Threonine              | 0.7232143          |
|              | Glucose                | 0.5594836          |
|              | Glutamate              | 0.64708805         |
|              | Valine                 | 0.816897           |
|              | Isoleucine             | 0.85000294         |
|              | Methionine             | 0.7810027          |
|              | Glycine                | 0.83308864         |
|              | Aspartate              | 0.6880368          |
|              | Citrate                | 0.84462184         |
| BMP-2        | Tyrosine               | 0.9042496          |
|              | Glucose                | 0.5141191          |
|              | Glutamine              | 0.4454798          |
|              | Glutamate              | 0.51396006         |
|              | Citrate                | 0.412483           |
|              | Myoinositol            | 0.5873857          |
|              | Urea                   | 0.36100852         |
|              | Threonine              | 0.54321337         |
|              | Glycerol               | 0.5594412          |
|              | Lactate                | 0.46642894         |
|              | Glycine                | 0.49511734         |
|              | Succinate              | 0.395437           |
|              | b-alanine              | 0.522683           |
|              | Tyrosine               | 0.61409324         |
|              | Valine                 | 0.55258584         |

*Red* and *green* denote significantly increased or decreased metabolites, respectively, as presented in the core metabolic network reconstruction. Fold changes are expressed as unlogged values.
