# Supplementary material
Source: PubMed Central journal article supplement (PMC5439454)
Supplement: Supp_Table4.pdf [file Supp_Table4.pdf]

SUPPLEMENTARY TABLE S4. SIGNIFICANT METABOLITE  
CHANGES IN OSTEOBLASTS COMPARED WITH DAY 21  
OF IN VITRO OSTEOGENESIS

| <i>Group</i> | <i>Metabolite name</i> | <i>Fold change</i> |
|--------------|------------------------|--------------------|
| Dex          | Ornithine              | 1.7475185          |
|              | Gaba                   | 2.2900906          |
|              | Urea                   | 0.54253936         |
|              | Phenylalanine          | 0.6059467          |
|              | Glutamine              | 0.59983367         |
|              | Citrate                | 0.48387167         |
|              | Tyrosine               | 0.60002            |
|              | Glycerol               | 0.6472072          |
|              | Fumarate               | 0.5819718          |
|              | Cholesterol            | 0.15575978         |
|              | b-alanine              | 0.84028673         |
|              | Lactate                | 0.6104794          |
|              | Isocitrate             | 0.9759753          |
|              | Glucose                | 0.51952326         |
| BMP-2        | Gaba                   | 3.948429           |
|              | Glycerol               | 3.5012558          |
|              | Glutamine              | 0.49668404         |
|              | Phenylalanine          | 0.4788572          |
|              | Urea                   | 0.4329258          |
|              | Citrate                | 0.55114174         |
|              | Myoinositol            | 0.58105046         |
|              | Lactate                | 0.4309276          |

*Red* and *green* denote significantly increased or decreased metabolites, respectively, as presented in the core metabolic network reconstruction; fold changes are expressed as unlogged values.
